# Supplementary material for: Design and Validation of a Portable Machine Learning-Based Electronic Nose
Source: MDPI journal article supplement (doi:10.3390/s21113923), 2021-06-07
Supplement: s1 [file s1]

# **Design and Validation of a Portable Machine Learning- Based Electronic Nose**

**Yixu Huang <sup>1</sup>, Iyll-Joon Doh <sup>1</sup>, and Euiwon Bae <sup>1,\*</sup>**

*<sup>1</sup>Applied Optics Laboratory, School of Mechanical Engineering, Purdue University, West*

*Lafayette, Indiana 47907, USA*

*\*Corresponding author: [ebae@purdue.edu](mailto:ebae@purdue.edu)*

**Table S1.** List of candidate sensors. Bold face sensors were selected to be used in the EMLA unit (10 different sensors). They were selected based on the wide variety of primary responses to the chemical species.

| Sensor             | Manufacturer | Cost /Unit | Primary Response                 | Secondary Response                                                                                                              |
|--------------------|--------------|------------|----------------------------------|---------------------------------------------------------------------------------------------------------------------------------|
| <b>MQ-6</b>        | Figaro       | \$4.95     | C <sub>3</sub> H <sub>8</sub>    | CH <sub>4</sub> , C <sub>2</sub> H <sub>5</sub> OH                                                                              |
| <b>MQ-4</b>        | Figaro       | \$4.95     | CH <sub>4</sub> ,                | C <sub>3</sub> H <sub>8</sub> , C <sub>2</sub> H <sub>5</sub> OH                                                                |
| <b>MQ-3</b>        | Figaro       | \$4.99     | C <sub>2</sub> H <sub>5</sub> OH | C <sub>4</sub> H <sub>10</sub> , CH <sub>4</sub> , CO                                                                           |
| MQ-7               | Figaro       | \$5.99     | H <sub>2</sub>                   | CH <sub>4</sub> , C <sub>2</sub> H <sub>5</sub> OH, CO                                                                          |
| MQ-8               | Figaro       | \$7.95     | H <sub>2</sub>                   | CH <sub>4</sub> , C <sub>2</sub> H <sub>5</sub> OH, CO                                                                          |
| <b>MQ-5</b>        | Figaro       | \$6.99     | C <sub>4</sub> H <sub>10</sub>   | CH <sub>4</sub> , C <sub>2</sub> H <sub>5</sub> OH, H <sub>2</sub>                                                              |
| <b>MQ-2</b>        | Figaro       | \$7.99     | C <sub>3</sub> H <sub>8</sub>    | C <sub>3</sub> H <sub>8</sub> , CH <sub>4</sub> , C <sub>2</sub> H <sub>5</sub> OH, H <sub>2</sub>                              |
| SGAS701            | Renesas      | \$31.24    | H <sub>2</sub>                   | C <sub>7</sub> H <sub>8</sub> , C <sub>3</sub> H <sub>6</sub> O, C <sub>8</sub> H <sub>18</sub> , C <sub>4</sub> H <sub>8</sub> |
| <b>SGAS707</b>     | Renesas      | \$31.24    | C <sub>2</sub> H <sub>5</sub> OH | C <sub>7</sub> H <sub>8</sub> , C <sub>3</sub> H <sub>6</sub> O, C <sub>8</sub> H <sub>18</sub> , C <sub>4</sub> H <sub>8</sub> |
| SGAS711            | Renesas      | \$31.24    | H <sub>2</sub>                   | C <sub>3</sub> H <sub>8</sub> , CH <sub>4</sub>                                                                                 |
| <b>MICS-5914</b>   | SGX sensor   | \$9.95     | NH <sub>3</sub>                  | C <sub>2</sub> H <sub>5</sub> OH, C <sub>3</sub> H <sub>8</sub> , C <sub>4</sub> H <sub>10</sub>                                |
| <b>MICS-5524</b>   | SGX sensor   | \$8.91     | CO                               | C <sub>2</sub> H <sub>5</sub> OH, H <sub>2</sub> , C <sub>4</sub> H <sub>10</sub>                                               |
| TGS2600-B00        | Figaro       | \$20.79    | H <sub>2</sub>                   | C <sub>2</sub> H <sub>5</sub> OH, C <sub>4</sub> H <sub>10</sub>                                                                |
| TGS2610-C00        | Figaro       | \$25.50    | C <sub>3</sub> H <sub>8</sub>    | CH <sub>4</sub> , C <sub>4</sub> H <sub>10</sub> , C <sub>2</sub> H <sub>5</sub> OH                                             |
| TGS2620-C00        | Figaro       | \$25.50    | C <sub>2</sub> H <sub>5</sub> OH | H <sub>2</sub> , C <sub>4</sub> H <sub>10</sub>                                                                                 |
| TGS813-A00         | Figaro       | \$25.50    | H <sub>2</sub>                   | C <sub>2</sub> H <sub>5</sub> OH, C <sub>4</sub> H <sub>10</sub> , CH <sub>4</sub>                                              |
| <b>TGS2602-B00</b> | Figaro       | \$25.50    | C <sub>7</sub> H <sub>8</sub>    | C <sub>2</sub> H <sub>5</sub> OH                                                                                                |
| TGS2611-C00        | Figaro       | \$25.50    | CH <sub>4</sub>                  | C <sub>4</sub> H <sub>10</sub> , C <sub>2</sub> H <sub>5</sub> OH                                                               |
| <b>TGS822-A00</b>  | Figaro       | \$25.50    | C <sub>3</sub> H <sub>6</sub> O  | C <sub>2</sub> H <sub>5</sub> OH, C <sub>6</sub> H <sub>6</sub>                                                                 |
| TGS6810-D0         | Figaro       | \$28.84    | C <sub>4</sub> H <sub>10</sub>   | C <sub>3</sub> H <sub>8</sub> , CH <sub>4</sub>                                                                                 |



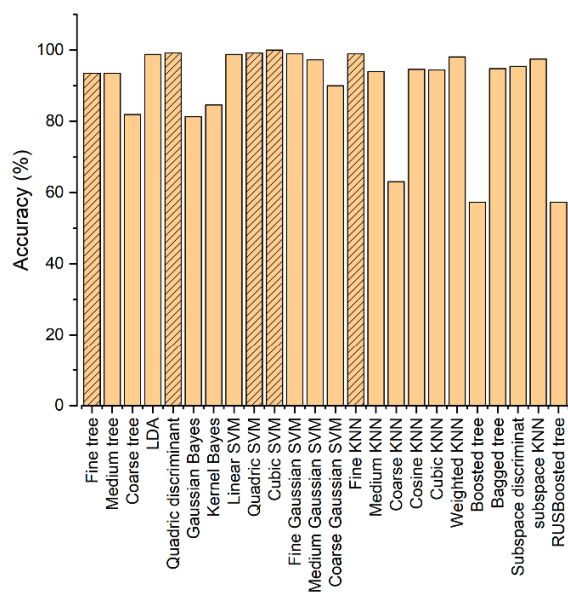

(A)

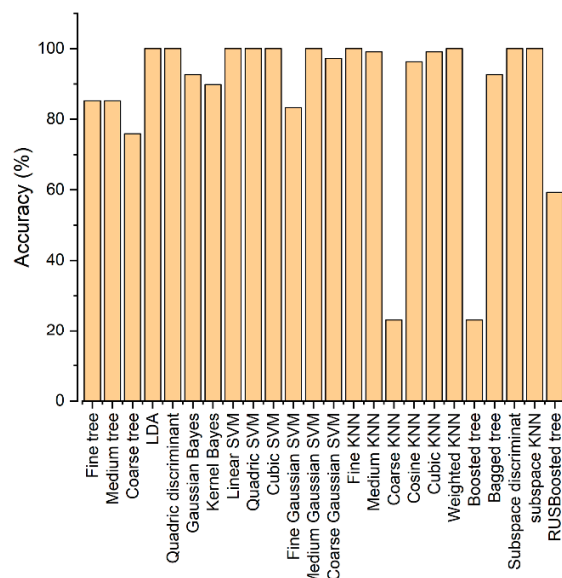

(B)

**Figure S2.** Survey of accuracy for 24 different classification methods. Tree (6 types), discriminant analysis (2), Bayesian (2), SVM (6), and KNN (7). (A) Wine sample (B) Oil sample.

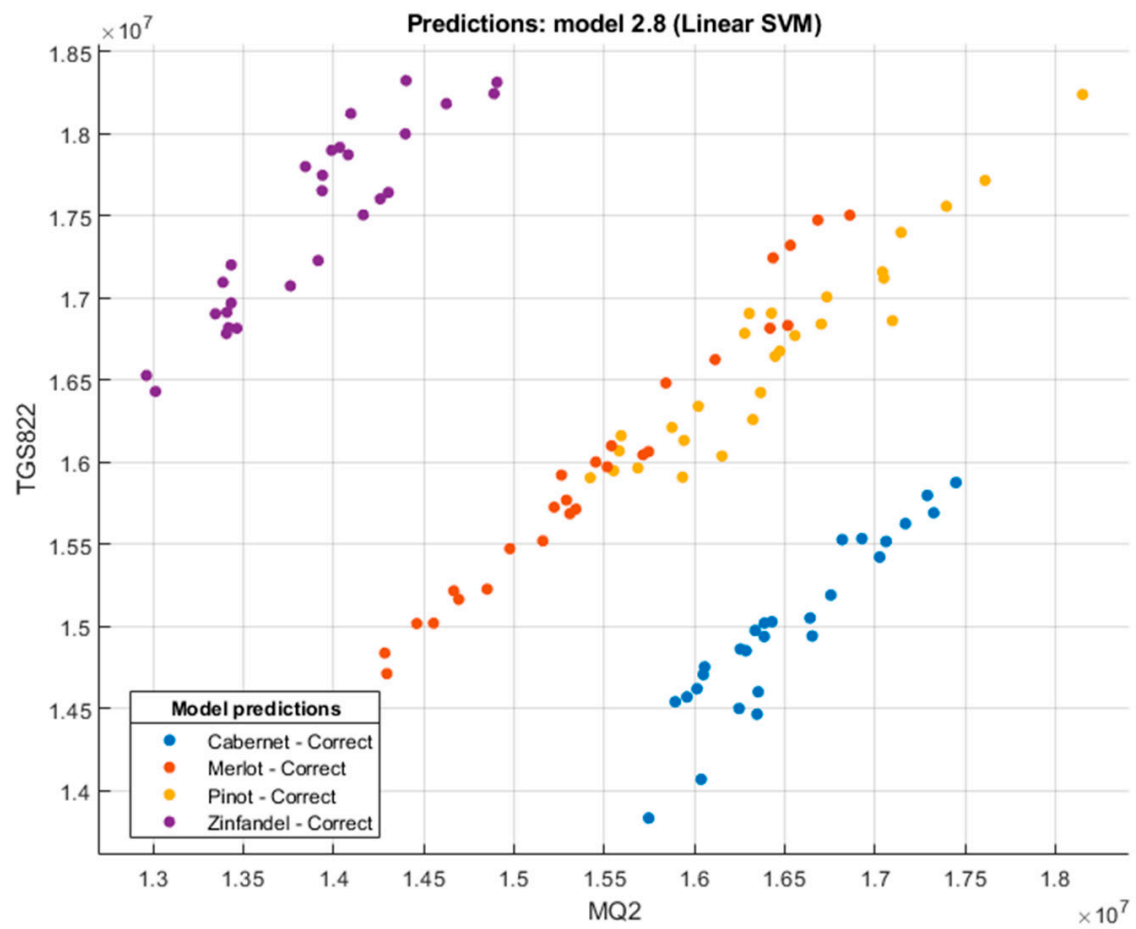

**Figure S3.** Scatterplot of four different wine samples depicted by two sensors: TGS822 and MQ2.

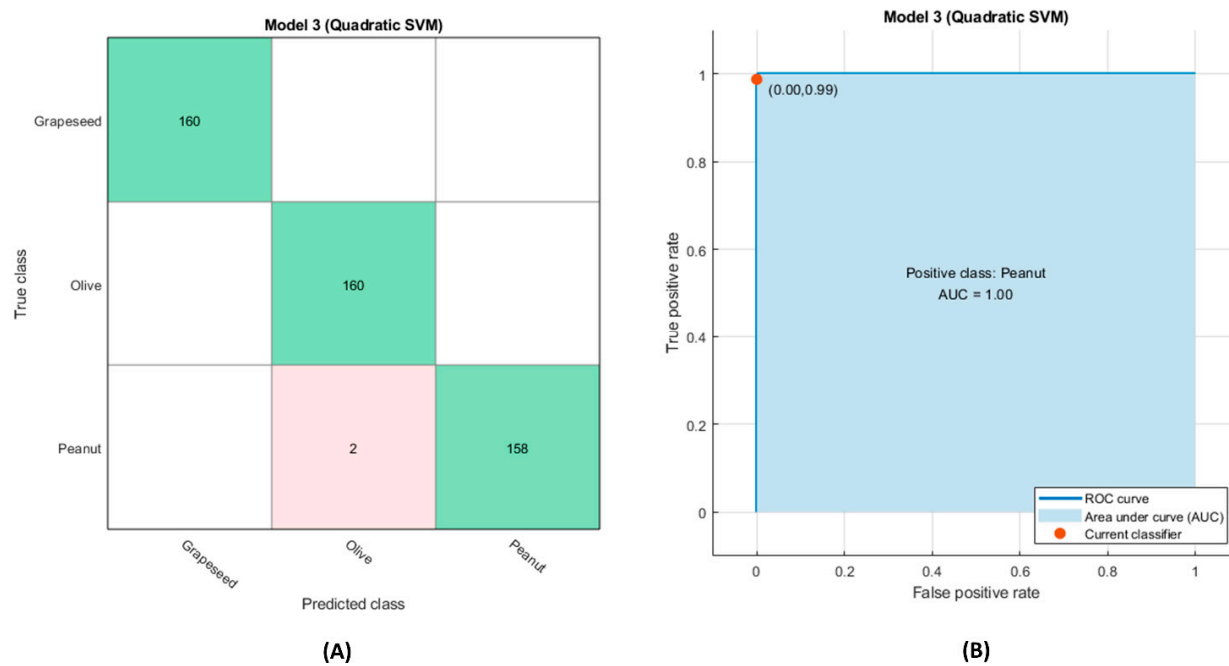

**Figure S4.** (A) Confusion matrix and (B) area under the curve graph for classification of wine samples.
